# Supplementary material for: The Mechanism of Hsp90 ATPase Stimulation by Aha1
Source: PubMed Central journal article supplement (PMC5018835; doi:10.1038/srep33179), 2016-09-12
Supplement: srep33179-s1.pdf [file srep33179-s1.pdf]

## The Mechanism of Hsp90 ATPase Stimulation by Aha1

Annemarie Wolmarans<sup>1</sup>, Brian Lee<sup>2</sup>, Leo Spyropoulos<sup>2</sup>, and Paul LaPointe<sup>1\*</sup>

From the Departments of Cell Biology<sup>1</sup> and Biochemistry<sup>2</sup>, University of Alberta, Edmonton, Alberta, CANADA, T6G 2H7

\* - Corresponding author (paul.lapointe@ualberta.ca)

### Supplemental Figures:

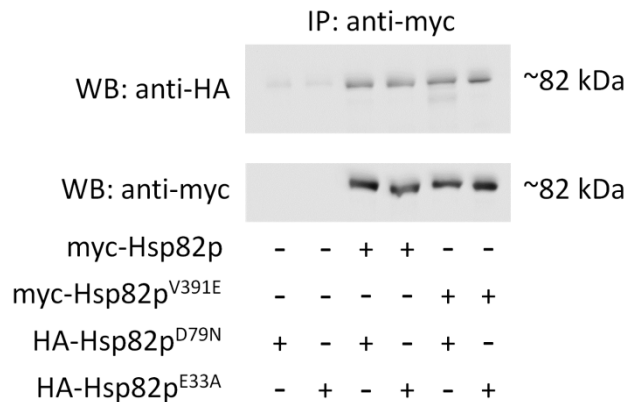

**Figure S1:** Heterodimers formation between wildtype Hsp82p, Hsp82p<sup>V391E</sup>, Hsp82p<sup>D79N</sup> and Hsp82p<sup>E33A</sup>. Hsp82p and Hsp82p<sup>V391E</sup> both form heterodimers with Hsp82p<sup>D79N</sup> and Hsp82p<sup>E33A</sup> as HA-tagged Hsp82p<sup>D79N</sup> and Hsp82p<sup>E33A</sup> co-ip with Myc myc-Hsp82p and myc-Hsp82p<sup>V391E</sup> pull down Hsp82p<sup>D79N</sup> and Hsp82p<sup>E33A</sup>. 5uM purified His-Myc-tagged Hsp82p or Hsp82p<sup>V391E</sup> was incubated with 5uM purified His-Flag-tagged Hsp82p<sup>D79N</sup> or Hsp82p<sup>E33A</sup> for 15 minutes. These reactions were incubated on a rotator at room temperature for 90 min. Beads were pelleted, washed once in 250uL of binding buffer, run on SDS-PAGE, and analyzed by western.

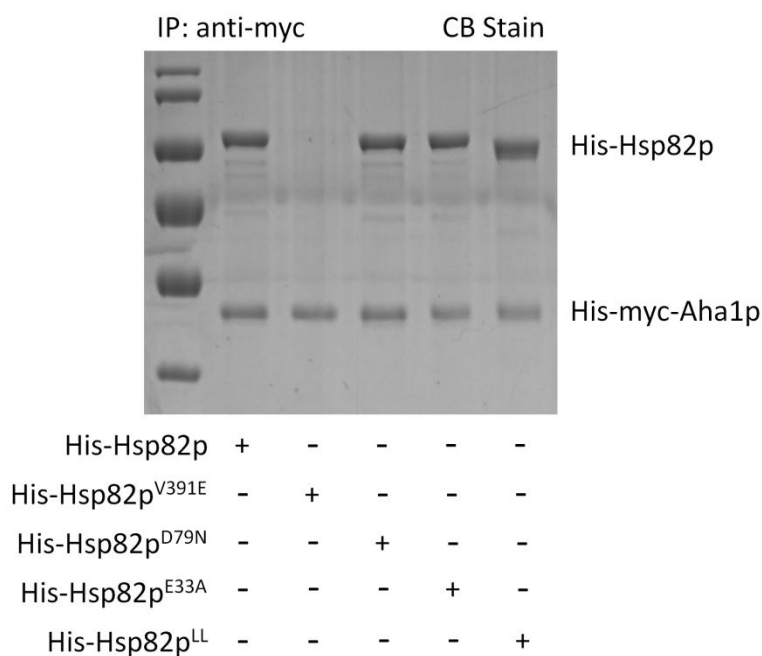

**Figure S2:** Hsp82p variants bind Aha1p. Wildtype Hsp82p, Hsp82p<sup>D79N</sup>, Hsp82p<sup>E33A</sup>, and Hsp82p<sup>LL</sup> all form a stable complex with myc-tagged Aha1p *in vitro*. Hsp82p<sup>V391E</sup> harbours a mutation that prevents the formation of a stable complex with Aha1p. 5uM of Hsp82 variants were incubated with 5uM 6x his-myc-tagged Aha1p. Complexes were isolated with beads coupled to anti-myc monoclonal antibody 9E10, run on SDS-PAGE and analyzed by Coomassie blue staining (CB).

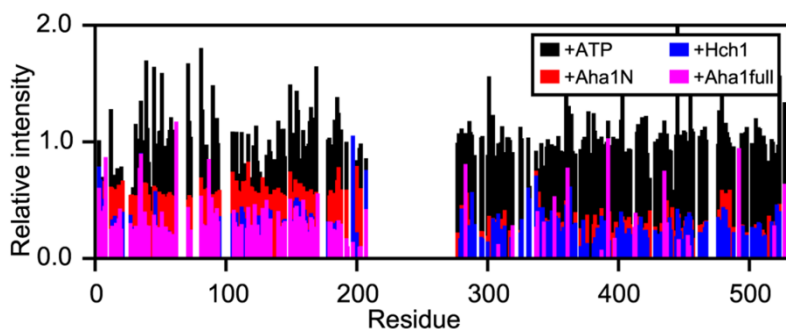

**Figure S3.** Chemical shift and peak intensity analysis in an Hsp82p N-M construct upon ATP, and co-chaperone binding. Peak intensity changes in Hsp82p N-M construct NMR spectra upon addition of ATP (black), Aha1p<sup>N</sup> (red), Hch1p (blue), and Aha1p (pink).
